# Supplementary material
Source: ML conference proceedings conference paper supplement (https://proceedings.mlr.press/v32/songa14.html)
Supplement: Supplementary file 2 [file songa14-supp.zip]

Archive with 3 entries (2 files):
- nonparametric_mixture_appendix.pdf
- __MACOSX/
- __MACOSX/._nonparametric_mixture_appendix.pdf
